# Supplementary material for: YerA41, a Yersinia ruckeri Bacteriophage: Determination of a Non-Sequencable DNA Bacteriophage Genome via RNA-Sequencing
Source: PubMed Central journal article supplement (PMC7354516; doi:10.3390/v12060620), 2020-06-05
Supplement: viruses-12-00620-s001.pdf [file viruses-12-00620-s001.pdf]

# Supplementary Material

---

## **YerA41, a *Yersinia ruckeri* bacteriophage: determination of a non-sequencable DNA bacteriophage genome via RNA-sequencing.**

**Katarzyna Leskinen<sup>1</sup>, Maria I. Pajunen<sup>1</sup>, Miguel Vincente Gomez-Raya Vilanova<sup>1</sup>, Saija Kiljunen<sup>1</sup>, Andrew Nelson<sup>2</sup>, Darren Smith<sup>2</sup> and Mikael Skurnik<sup>1,3,\*</sup>**

<sup>1</sup> Department of Bacteriology and Immunology, Medicum, Human Microbiome Research Program, Faculty of Medicine, University of Helsinki, Helsinki, Finland;

<sup>2</sup> Applied Sciences, University of Northumbria, Newcastle upon Tyne, United Kingdom

<sup>3</sup> Division of Clinical Microbiology, Helsinki University Hospital, HUSLAB, Helsinki, Finland

\* Correspondence: mikael.skurnik@helsinki.fi; Tel.: +358-2941-26464

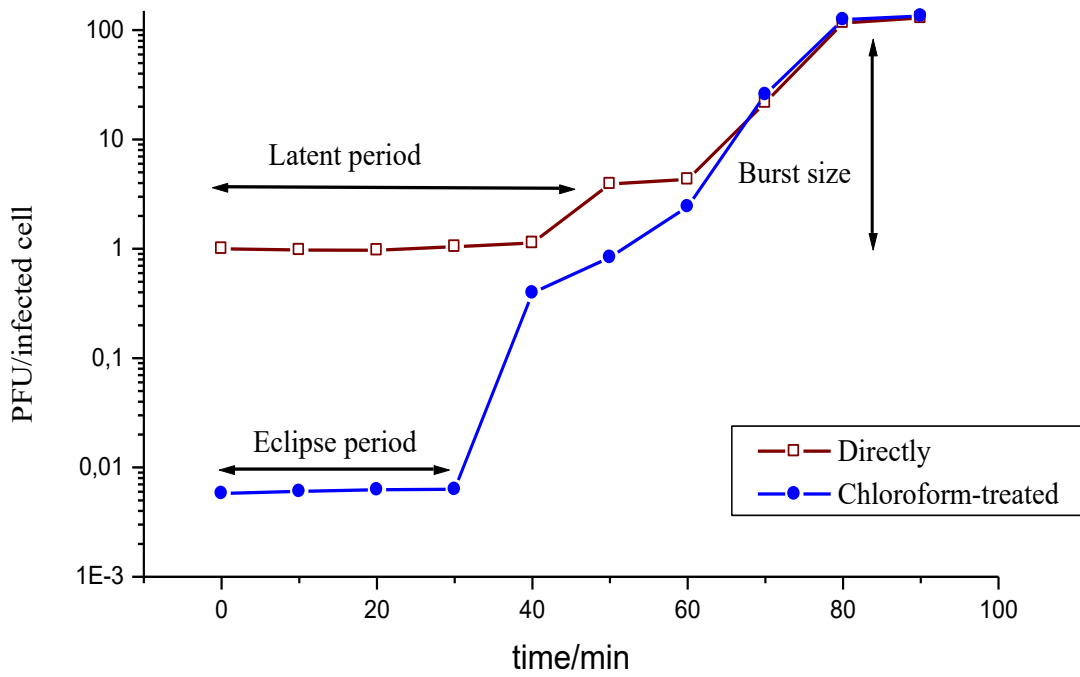

**Figure S1.** One-step growth curve of bacteriophage YerA41. Shown are PFU per infected cell in chloroform-treated and -untreated cultures at different time points. Each data point represents a mean of two experiments. The number of plaque forming units (PFU) in the immediately diluted 0 min time point samples was set to 1 to represent the number of infected cells in the experiment, and the PFU of all the other samples were normalized against that number. The burst size was then directly obtained from the normalized value after the rise period

**Table S1.** Bacterial strains used in this study (YRLBSC, Yersinia Research Laboratory Bacterial Strain Collection).

| Species                        | Strain           | O-serotype   | Description                                           | Reference(s)/Source |
|--------------------------------|------------------|--------------|-------------------------------------------------------|---------------------|
| <i>Shigella flexneri</i>       | 784/83           | -            |                                                       | YRLBSC              |
| <i>Salmonella typhimurium</i>  | ATCC13311        | -            |                                                       | YRLBSC              |
| <i>Providencia rettgeri</i>    | 121/84           | -            | patient isolate                                       | YRLBSC              |
| <i>Yersinia bercovieri</i>     | 3016/84          | 58,16        | patient isolate                                       | [1]                 |
| <i>Yersinia bercovieri</i>     | 127/84           | -            | patient isolate                                       | YRLBSC              |
| <i>Yersinia enterocolitica</i> | 1539             | -            |                                                       | YRLBSC              |
|                                | gk132            | 1            | patient isolate                                       | YRLBSC              |
|                                | JDE029           | 1            |                                                       | [2]                 |
|                                | JDE766           | 1,2,3        |                                                       | [2]                 |
|                                | 15126/78         | 3            |                                                       | YRLBSC              |
|                                | YeO3-R1          | 3            | spontaneous rough mutant of YeO3-c                    | [3]                 |
|                                | 3102/80          | 10           | patient isolate                                       | [4]                 |
|                                | 3788/80          | 10           |                                                       | YRLBSC              |
|                                | gc1209-79        | 13           | patient isolate                                       | [5]                 |
|                                | gc9312-78        | 13,18        | patient isolate                                       | [5]                 |
|                                | 2446/84          | 13,7         | patient isolate                                       | YRLBSC              |
|                                | 421/84           | 13,7         | patient isolate                                       | YRLBSC              |
|                                | ST5074           | 13a, 13b     |                                                       | YRLBSC              |
|                                | ST5081           | 13a,13b      |                                                       | YRLBSC              |
|                                | 15712/83         | 14           | patient isolate                                       | YRLBSC              |
|                                | RBC36M3          | 15           |                                                       | [6]                 |
|                                | IP614            | 15           |                                                       | YRLBSC              |
|                                | gk2943           | 2            | patient isolate                                       | [7]                 |
|                                | gk1142           | 2            |                                                       | [7]                 |
|                                | gc874-77         | 20           |                                                       | [5]                 |
|                                | gc1223-75        | 20           |                                                       | [5]                 |
|                                | RBE736           | 21           |                                                       | [6]                 |
|                                | WI-81-50         | 21           |                                                       | [8]                 |
|                                | 431/84           | 25           |                                                       | YRLBSC              |
|                                | 8425/83-φR1-37-R | 25,26        | φR1-37 resistant spontaneous mutant of strain 8425/83 | YRLBSC              |
|                                | 18425/83         | 25,26,44     | patient isolate                                       | YRLBSC              |
|                                | 63/84            | 26,44        | patient isolate                                       | YRLBSC              |
|                                | 5186/84          | 28,50        |                                                       | YRLBSC              |
|                                | 6471/76          | 3            | pYV <sup>+</sup> patient isolate                      | [4]                 |
|                                | gc2139-72        | 34           |                                                       | [5]                 |
|                                | 7104/83          | 35,36        | patient isolate                                       | YRLBSC              |
|                                | 248/84           | 35,52        | patient isolate                                       | YRLBSC              |
|                                | gc3973-76        | 4            | patient isolate                                       | [5]                 |
|                                | RBE701           | 4,32         |                                                       | [6]                 |
|                                | JDE701           | 4,32         | patient isolate                                       | [8]                 |
|                                | 346/84           | 41(27), 43   | patient isolate                                       | YRLBSC              |
|                                | 19942/83         | 41(27),42 K1 | patient isolate                                       | YRLBSC              |
|                                | 647/83           | 41(27),43    |                                                       | YRLBSC              |
|                                | 626/84           | 41(27)42     | patient isolate                                       | YRLBSC              |
|                                | 9613/83          | 41(27)K1     | patient isolate                                       | YRLBSC              |
|                                | 264/85           | 41,43        | patient isolate                                       | YRLBSC              |
|                                | 477/78           | 5            |                                                       | YRLBSC              |
|                                | 892/82           | 5            |                                                       | YRLBSC              |
|                                | 14779/83         | 5            |                                                       | YRLBSC              |
|                                | gk7500           | 5,27         |                                                       | [7]                 |
|                                | MPDE654          | 5,27         |                                                       | [9]                 |
|                                | 3229             | 50           |                                                       | [4]                 |
|                                | 3229-φR1-37-R    | 50           | φR1-37 resistant spontaneous mutant of strain 3229    | YRLBSC              |
|                                | 590/80           | 6            | patient isolate                                       | [4]                 |
|                                | 341/84           | 6            | patient isolate                                       | YRLBSC              |

| Species                             | Strain     | O-serotype  | Description     | Reference(s)/Source |
|-------------------------------------|------------|-------------|-----------------|---------------------|
|                                     | 189/80     | 6,30        | patient isolate | [4]                 |
|                                     | 6737/80    | 6,30        | patient isolate | [4]                 |
|                                     | 1309/80    | 6,31        |                 | [4]                 |
|                                     | 438/80     | 6,31        |                 | YRLBSC              |
|                                     | 22848/79   | 7,8         |                 | YRLBSC              |
|                                     | 605        | 7,8         | patient isolate | YRLBSC              |
|                                     | 1308/83    | 7,8         |                 | YRLBSC              |
|                                     | 5898/83    | 7,8         |                 | YRLBSC              |
|                                     | 17869/83   | 7,8         |                 | YRLBSC              |
|                                     | 623/83     | 7,8         | patient isolate | YRLBSC              |
|                                     | 21368/83   | 7,8         | patient isolate | YRLBSC              |
|                                     | 21943/83   | 7,8         | patient isolate | YRLBSC              |
|                                     | TAMTU      | 8           |                 | YRLBSC              |
|                                     | p310       | 8           | patient isolate | YRLBSC              |
|                                     | MCH314     | 8           | patient isolate | YRLBSC              |
|                                     | CDCA2635   | 8           |                 | [10]                |
|                                     | 8081       | 8           |                 | [11]                |
|                                     | 277/74     | 9           | patient isolate | YRLBSC              |
|                                     | Ruokola/71 | 9           | patient isolate | [4]                 |
|                                     | 4367/83    | K1 nt       |                 | YRLBSC              |
|                                     | 5653/80    | na          |                 | YRLBSC              |
|                                     | 8533/84    | na          | patient isolate | YRLBSC              |
|                                     | 10/84      | nt          | patient isolate | YRLBSC              |
|                                     | gc2138-72  | nt          | patient isolate | [5]                 |
|                                     | 659/83     | nt K1       | patient isolate | YRLBSC              |
|                                     | 15240/84   | nt          | patient isolate | YRLBSC              |
| <i>Yersinia frederikseni</i>        | 146/85     | -           |                 | YRLBSC              |
|                                     | 12733/85   | -           |                 | YRLBSC              |
|                                     | 22714/85   | -           |                 | YRLBSC              |
|                                     | 3400/83    | 16          |                 | YRLBSC              |
|                                     | 3317/84    | 35          | patient isolate | YRLBSC              |
|                                     | 38/83      | 48          |                 | YRLBSC              |
|                                     | BR166/97   | -           |                 | YRLBSC              |
| <i>Yersinia intermedia</i>          | 9/85       | 16,21       |                 | YRLBSC              |
|                                     | 821/84     | 52,54       | patient isolate | YRLBSC              |
| <i>Yersinia kristensenii</i>        | 404/81     | -           |                 | YRLBSC              |
|                                     | 3688/85    | -           | patient isolate | YRLBSC              |
|                                     | 119/84     | 12,25       | patient isolate | [4]                 |
|                                     | 404/81     | 16          | patient isolate | YRLBSC              |
|                                     | 317/82     | 16          |                 | YRLBSC              |
| <i>Yersinia mollareti</i>           | 92/84      | 59(20,36,7) |                 | [1]                 |
| <i>Yersinia pestis</i>              | EV76       |             |                 | YRLBSC              |
|                                     | KIM D27    |             |                 | YRLBSC              |
| <i>Yersinia pseudo-tuberculosis</i> | 2812/79    | 1           |                 | YRLBSC              |
|                                     | 6088       | 10          |                 | [12]                |
|                                     | R80        | 11          |                 | [12]                |
|                                     | MW86       | 12          |                 | [12]                |
|                                     | N916       | 13          |                 | [12]                |
|                                     | CN3        | 14          |                 | [12]                |
|                                     | 93422      | 15          |                 | [12]                |
|                                     | Pa3606     | 1b          |                 | [12]                |
|                                     | Kuratani   | 1c          |                 | [12]                |
|                                     | lab strain | 2           |                 | YRLBSC              |
|                                     | p28        | 2           |                 | YRLBSC              |
|                                     | lab strain | 2a          |                 | YRLBSC              |
|                                     | 208        | 2a          |                 | [12]                |
|                                     | 1779       | 2b          |                 | [13]                |
|                                     | 274        | 2c          |                 | [12]                |
|                                     | 324/80     | 3           |                 | YRLBSC              |
|                                     | Marsu      | 3           |                 | YRLBSC              |
|                                     | 51         | 4a          |                 | [12]                |
|                                     | Pa3422     | 4b          |                 | [12]                |

| Species                 | Strain | O-serotype | Description           | Reference(s)/Source |
|-------------------------|--------|------------|-----------------------|---------------------|
|                         | 204    | 5a         |                       | [12]                |
|                         | 197    | 5b         |                       | [12]                |
|                         | DD110  | 6          |                       | [12]                |
|                         | 257    | 7          |                       | [12]                |
|                         | 151    | 8          |                       | [12]                |
| <i>Yersinia similis</i> | MW48   | 9          |                       | YRLBSC              |
|                         | R626R  | 9          |                       | YRLBSC              |
|                         | R708Ly | 9          |                       | YRLBSC              |
|                         | R708   | 9          |                       | [12]                |
| <i>Yersinia ruckeri</i> | OMBL3  |            |                       | YRLBSC              |
|                         | RS41   |            | host for phage YerA41 | [14]                |

**Table S2.** List of predicted protein coding genes identified in YerA41 sequence scaffolds. The phage particle associated proteins (PPAP) were identified using LC-MS/MS analysis.

| geneID | Scaffold | protein length [aa] | expected function                      | phase of expression | PPAP |
|--------|----------|---------------------|----------------------------------------|---------------------|------|
| 001    | 1        | 196                 | hypothetical protein                   | late                |      |
| 002    | 1        | 104                 | hypothetical protein                   | late                | x    |
| 003    | 1        | 101                 | hypothetical protein                   | late                | x    |
| 004    | 1        | 175                 | hypothetical protein                   | late                | x    |
| 005    | 1        | 157                 | hypothetical protein                   | late                | x    |
| 006    | 1        | 132                 | hypothetical protein                   | late                | x    |
| 007    | 1        | 622                 | Putative DNA packaging terminase       | late                | x    |
| 008    | 1        | 136                 | hypothetical protein                   | late                | x    |
| 009    | 1        | 113                 | hypothetical protein                   | late                | x    |
| 010    | 1        | 516                 | hypothetical protein                   | late                | x    |
| 011    | 1        | 289                 | hypothetical protein                   | late                | x    |
| 012    | 1        | 271                 | Putative prohead core protein protease | late                | x    |
| 013    | 1        | 401                 | hypothetical protein                   | late                | x    |
| 014    | 1        | 471                 | Putative capsid protein                | late                | x    |
| 015    | 1        | 285                 | hypothetical protein                   | late                |      |
| 016    | 1        | 299                 | Putative sugar binding protein         | late                | x    |
| 017    | 1        | 113                 | hypothetical protein                   | late                | x    |
| 018    | 1        | 309                 | hypothetical protein                   | late                |      |
| 019    | 1        | 171                 | Putative RNA polymerase sigma factor   | late                | x    |
| 020    | 1        | 188                 | hypothetical protein                   | late                |      |
| 021    | 1        | 199                 | hypothetical protein                   | late                |      |
| 022    | 1        | 247                 | hypothetical protein                   | late                | x    |
| 023    | 1        | 61                  | hypothetical protein                   | late                |      |
| 024    | 1        | 860                 | Putative phage tail sheath protein     | late                | x    |
| 025    | 1        | 179                 | Putative tail protein                  | late                |      |
| 026    | 1        | 176                 | hypothetical protein                   | late                |      |
| 027    | 1        | 251                 | hypothetical protein                   | early               |      |
| 028    | 1        | 1043                | Putative tail family                   | late                | x    |
| 029    | 1        | 221                 | hypothetical protein                   | late                |      |
| 030    | 1        | 107                 | hypothetical protein                   | late                |      |
| 031    | 1        | 367                 | Putative tail protein                  | late                |      |
| 032    | 1        | 123                 | Putative tail protein                  | late                |      |
| 033    | 1        | 723                 | hypothetical protein                   | late                |      |

|     |   |      |                                                                      |        |   |
|-----|---|------|----------------------------------------------------------------------|--------|---|
| 034 | 1 | 243  | Putative tail-associated lysozyme                                    | late   |   |
| 035 | 1 | 95   | Putative tail-associated lysozyme                                    | late   |   |
| 036 | 1 | 122  | hypothetical protein                                                 | late   |   |
| 037 | 1 | 551  | Putative baseplate wedge                                             | late   | x |
| 038 | 1 | 538  | hypothetical protein                                                 | late   |   |
| 039 | 1 | 165  | hypothetical protein                                                 | late   |   |
| 040 | 1 | 135  | Putative capsid protein                                              | late   |   |
| 041 | 1 | 104  | Putative virion structural protein                                   | late   |   |
| 042 | 1 | 361  | Putative baseplate wedge protein                                     | late   | x |
| 043 | 1 | 386  | Putative tail fiber protein                                          | late   | x |
| 044 | 1 | 207  | Phage tail fiber assembly protein                                    | late   | x |
| 045 | 1 | 246  | Putative tail fiber protein                                          | late   | x |
| 046 | 1 | 108  | hypothetical protein                                                 | late   |   |
| 047 | 1 | 95   | hypothetical protein                                                 | late   |   |
| 048 | 1 | 113  | hypothetical conserved protein                                       | early  |   |
| 049 | 1 | 177  | Putative endolysin                                                   | late   | x |
| 050 | 1 | 153  | hypothetical protein                                                 | late   |   |
| 051 | 1 | 97   | hypothetical protein                                                 | late   |   |
| 052 | 1 | 169  | hypothetical protein                                                 | late   | x |
| 053 | 2 | 230  | hypothetical protein                                                 | early  |   |
| 054 | 2 | 556  | Putative DNA directed RNA polymerase, subunit                        | early  | x |
| 055 | 2 | 518  | Putative DNA-directed RNA polymerase, subunit                        | early  | x |
| 056 | 2 | 924  | Putative DNA-directed RNA polymerase                                 | early  | x |
| 057 | 2 | 78   | hypothetical protein                                                 | early  |   |
| 058 | 2 | 335  | hypothetical protein                                                 | middle | x |
| 059 | 2 | 167  | hypothetical protein                                                 | middle |   |
| 060 | 2 | 222  | Putative 5'-deoxynucleotidase                                        | middle |   |
| 061 | 2 | 1306 | Putative DNA polymerase                                              | middle | x |
| 062 | 2 | 279  | hypothetical protein                                                 | middle |   |
| 063 | 2 | 232  | hypothetical protein                                                 | middle |   |
| 064 | 2 | 370  | Putative UDP-GlcNAc 2-epimerase                                      | middle |   |
| 065 | 2 | 257  | Putative oxidoreductase                                              | middle |   |
| 066 | 2 | 230  | Putative SDR family oxidoreductase                                   | middle |   |
| 067 | 2 | 231  | Putative polysaccharide deacetylase                                  | middle |   |
| 068 | 2 | 455  | 2-C-methyl-D-erythritol 4-phosphate cytidyltransferase (EC 2.7.7.60) | middle |   |
| 069 | 2 | 393  | hypothetical protein                                                 | middle | x |
| 070 | 2 | 272  | Putative glycerophosphodiester phosphodiesterase                     | middle |   |
| 071 | 2 | 217  | hypothetical protein                                                 | middle | x |
| 072 | 2 | 50   | hypothetical protein                                                 | middle |   |
| 073 | 2 | 106  | hypothetical protein                                                 | early  |   |
| 074 | 2 | 165  | hypothetical protein                                                 | middle | x |
| 075 | 2 | 154  | hypothetical protein                                                 | early  |   |
| 076 | 2 | 178  | hypothetical conserved protein                                       | middle | x |
| 077 | 2 | 156  | hypothetical protein                                                 | middle | x |
| 078 | 2 | 186  | Putative lytic transglycosylase                                      | early  | x |
| 079 | 2 | 97   | hypothetical protein                                                 | middle |   |
| 080 | 2 | 106  | hypothetical conserved protein                                       | early  |   |
| 081 | 2 | 166  | hypothetical protein                                                 | early  |   |
| 082 | 3 | 205  | hypothetical protein                                                 | middle |   |
| 083 | 3 | 124  | hypothetical protein                                                 | early  |   |
| 084 | 3 | 177  | hypothetical protein                                                 | middle |   |
| 085 | 3 | 60   | hypothetical protein                                                 | middle |   |

|     |   |     |                                                    |        |   |
|-----|---|-----|----------------------------------------------------|--------|---|
| 086 | 3 | 304 | hypothetical protein                               | middle |   |
| 087 | 3 | 116 | hypothetical protein                               | early  |   |
| 088 | 3 | 101 | hypothetical protein                               | middle |   |
| 089 | 3 | 69  | hypothetical protein                               | middle |   |
| 090 | 3 | 124 | hypothetical protein                               | middle |   |
| 091 | 3 | 134 | hypothetical protein                               | middle |   |
| 092 | 3 | 142 | hypothetical conserved protein                     | middle |   |
| 093 | 3 | 153 | hypothetical protein                               | middle |   |
| 094 | 3 | 69  | hypothetical protein                               | middle |   |
| 095 | 3 | 82  | hypothetical protein                               | middle |   |
| 096 | 3 | 123 | hypothetical protein                               | early  |   |
| 097 | 3 | 257 | Putative DNA polymerase III, subunit               | early  |   |
| 098 | 3 | 62  | hypothetical protein                               | middle |   |
| 099 | 3 | 204 | hypothetical protein                               | middle |   |
| 100 | 3 | 179 | hypothetical conserved protein                     | middle |   |
| 101 | 3 | 215 | hypothetical protein                               | middle |   |
| 102 | 3 | 104 | hypothetical protein                               | middle |   |
| 103 | 3 | 91  | hypothetical conserved protein                     | middle |   |
| 104 | 3 | 124 | hypothetical protein                               | middle |   |
| 105 | 3 | 115 | hypothetical protein                               | middle | x |
| 106 | 3 | 92  | hypothetical protein                               | middle |   |
| 107 | 3 | 143 | hypothetical protein                               | middle |   |
| 108 | 3 | 87  | hypothetical protein                               | middle |   |
| 109 | 3 | 363 | Ribonucleotide reductase                           | middle |   |
| 110 | 3 | 757 | ribonucleoside-diphosphate reductase subunit alpha | middle | x |
| 111 | 3 | 177 | hypothetical conserved protein                     | middle | x |
| 112 | 3 | 473 | Putative ribosomal protein modification protein    | middle | x |
| 113 | 3 | 80  | hypothetical protein                               | middle |   |
| 114 | 3 | 215 | Putative dCTP deaminase                            | middle |   |
| 115 | 3 | 124 | hypothetical protein                               | middle |   |
| 116 | 3 | 124 | Putative RNA 2'-phosphotransferase                 | early  |   |
| 117 | 3 | 216 | hypothetical protein                               | early  |   |
| 118 | 3 | 106 | hypothetical protein                               | early  |   |
| 119 | 3 | 273 | hypothetical protein                               | early  |   |
| 120 | 3 | 126 | hypothetical protein                               | early  |   |
| 121 | 3 | 58  | hypothetical protein                               | early  |   |
| 122 | 3 | 191 | hypothetical protein                               | early  |   |
| 123 | 3 | 62  | hypothetical protein                               | early  |   |
| 124 | 3 | 203 | hypothetical protein                               | middle |   |
| 125 | 3 | 102 | hypothetical protein                               | early  | x |
| 126 | 3 | 254 | Putative endonuclease-like protein                 | early  |   |
| 127 | 3 | 385 | Putative thymidylate synthetase                    | middle |   |
| 128 | 3 | 102 | hypothetical protein                               | middle |   |
| 129 | 3 | 155 | hypothetical protein                               | middle | x |
| 130 | 4 | 76  | hypothetical protein                               | early  |   |
| 131 | 4 | 127 | hypothetical protein                               | early  |   |
| 132 | 4 | 241 | hypothetical protein                               | early  | x |
| 133 | 4 | 74  | Putative transglycosylase                          | middle |   |
| 134 | 4 | 193 | hypothetical protein                               | early  |   |
| 135 | 4 | 677 | Putative DNA topoisomerase                         | early  | x |
| 136 | 4 | 440 | Putative DNA topoisomerase                         | middle | x |
| 137 | 4 | 241 | Putative DNA polymerase III, subunit               | middle | x |
| 138 | 4 | 84  | hypothetical protein                               | middle |   |

|     |   |      |                                                                       |        |   |
|-----|---|------|-----------------------------------------------------------------------|--------|---|
| 139 | 4 | 69   | hypothetical protein                                                  | middle | x |
| 140 | 4 | 305  | Putative structural protein                                           | middle |   |
| 141 | 4 | 265  | Putative dUTP diphosphatase                                           | middle | x |
| 142 | 4 | 95   | hypothetical protein                                                  | middle |   |
| 143 | 4 | 484  | Putative ATP-dependent DNA helicase                                   | middle | x |
| 144 | 4 | 54   | hypothetical protein                                                  | middle |   |
| 145 | 4 | 359  | Putative replicative helicase                                         | middle |   |
| 146 | 4 | 73   | hypothetical protein                                                  | middle |   |
| 147 | 4 | 201  | hypothetical protein                                                  | middle |   |
| 148 | 4 | 377  | hypothetical protein                                                  | middle | x |
| 149 | 4 | 322  | Putative exodeoxyribonuclease                                         | middle | x |
| 150 | 5 | 119  | hypothetical protein                                                  | early  |   |
| 151 | 5 | 80   | hypothetical protein                                                  | middle |   |
| 152 | 5 | 130  | hypothetical protein                                                  | middle | x |
| 153 | 5 | 130  | hypothetical protein                                                  | middle |   |
| 154 | 5 | 224  | hypothetical protein                                                  | middle | x |
| 155 | 5 | 171  | hypothetical protein                                                  | middle |   |
| 156 | 5 | 106  | hypothetical protein                                                  | middle |   |
| 157 | 5 | 142  | hypothetical protein                                                  | middle |   |
| 158 | 5 | 80   | hypothetical protein                                                  | middle |   |
| 159 | 5 | 155  | hypothetical protein                                                  | middle |   |
| 160 | 5 | 190  | hypothetical protein                                                  | middle |   |
| 161 | 5 | 251  | Putative tail fiber protein                                           | early  |   |
| 162 | 5 | 540  | Putative DNA directed RNA polymerase, subunit / Putative DNA helicase | early  |   |
| 163 | 5 | 76   | hypothetical protein                                                  | middle |   |
| 164 | 5 | 59   | hypothetical protein                                                  | middle |   |
| 165 | 5 | 41   | hypothetical protein                                                  | middle |   |
| 166 | 5 | 67   | hypothetical conserved protein                                        | middle |   |
| 167 | 5 | 210  | Putative endonuclease                                                 | middle | x |
| 168 | 5 | 94   | hypothetical protein                                                  | middle |   |
| 169 | 5 | 141  | hypothetical conserved protein                                        | middle |   |
| 170 | 5 | 125  | hypothetical protein                                                  | middle |   |
| 171 | 5 | 102  | hypothetical protein                                                  | middle |   |
| 172 | 5 | 91   | hypothetical conserved protein                                        | middle |   |
| 173 | 5 | 34   | hypothetical protein                                                  | middle |   |
| 174 | 5 | 120  | Putative phage baseplate assembly protein                             | middle |   |
| 175 | 5 | 52   | hypothetical protein                                                  | middle |   |
| 176 | 5 | 40   | hypothetical protein                                                  | late   |   |
| 177 | 5 | 82   | hypothetical protein                                                  | middle |   |
| 178 | 6 | 203  | hypothetical protein                                                  | early  |   |
| 179 | 6 | 283  | Putative exonuclease                                                  | middle |   |
| 180 | 6 | 1012 | Putative exonuclease                                                  | middle | x |
| 181 | 6 | 58   | hypothetical protein                                                  | middle | x |
| 182 | 6 | 173  | hypothetical protein                                                  | middle | x |
| 183 | 6 | 184  | hypothetical conserved protein                                        | middle |   |
| 184 | 6 | 138  | hypothetical protein                                                  | middle |   |
| 185 | 6 | 201  | hypothetical conserved protein                                        | middle | x |
| 186 | 6 | 68   | hypothetical protein                                                  | early  |   |
| 187 | 6 | 107  | hypothetical protein                                                  | early  |   |
| 188 | 6 | 94   | hypothetical protein                                                  | early  |   |
| 189 | 7 | 233  | Putative endonuclease-like protein                                    | early  |   |
| 190 | 7 | 675  | DNA topoisomerase                                                     | early  | x |



|     |   |     |                                |        |   |
|-----|---|-----|--------------------------------|--------|---|
| 191 | 7 | 119 | hypothetical protein           | middle |   |
| 192 | 7 | 118 | hypothetical protein           | middle |   |
| 193 | 7 | 481 | Putative helicase              | early  | x |
| 194 | 8 | 98  | hypothetical protein           | early  |   |
| 195 | 8 | 298 | Putative DNA polymerase        | early  |   |
| 196 | 8 | 73  | hypothetical conserved protein | early  |   |
| 197 | 8 | 639 | hypothetical protein           | early  | x |
| 198 | 8 | 70  | hypothetical protein           | early  |   |
| 199 | 9 | 637 | Putative DNA ligase            | early  | x |
| 200 | 9 | 65  | hypothetical protein           | -      |   |
| 201 | 9 | 82  | hypothetical protein           | -      |   |

**Table S3.** Transcriptional response in YerA41 infected *Y. ruckeri* cells. The lists of genes differentially expressed at 15, 30 and 60 min p.i. LogFC; log-ratio of a transcript's expression values in two different conditions. FDR; False Discovery Rate.

### 15 min vs 0

| Gene         | Function of the gene product                                                                                                         | logFC  | FDR                    |
|--------------|--------------------------------------------------------------------------------------------------------------------------------------|--------|------------------------|
| CSF007_0230  | Promiscuous sugar phosphatase YidA%2C haloacid dehalogenase-like phosphatase family                                                  | 0.86   | 0.000484               |
| CSF007_0240  | Outer membrane lipoprotein YidQ                                                                                                      | -1.116 | $7.97 \times 10^{-8}$  |
| CSF007_0245  | 16 kDa heat shock protein A                                                                                                          | -1.37  | 0.000331               |
| CSF007_0250  | 16 kDa heat shock protein B                                                                                                          | -1.62  | $5.50 \times 10^{-7}$  |
| CSF007_0605  | Aerobic C4-dicarboxylate transporter for fumarate%2C L-malate%2C D-malate%2C succinate                                               | -1.23  | $1.07 \times 10^{-9}$  |
| CSF007_0665  | Glutathione reductase                                                                                                                | 2.88   | $3.43 \times 10^{-31}$ |
| CSF007_0675  | Oligopeptidase A                                                                                                                     | -1.03  | 0.000428               |
| CSF007_0690  | Universal stress protein A                                                                                                           | -1.20  | $1.55 \times 10^{-7}$  |
| CSF007_0800  | hypothetical protein                                                                                                                 | -1.12  | $1.77 \times 10^{-5}$  |
| CSF007_0860  | High-affinity gluconate transporter GntT                                                                                             | -1.38  | $4.39 \times 10^{-9}$  |
| CSF007_0865  | Gluconokinase                                                                                                                        | -2.12  | $9.37 \times 10^{-17}$ |
| CSF007_0935  | Transcriptional activator of maltose regulon%2C MalT                                                                                 | -1.49  | $7.07 \times 10^{-14}$ |
| CSF007_0940  | Maltodextrin phosphorylase                                                                                                           | -1.31  | $6.96 \times 10^{-5}$  |
| CSF007_0980  | Ferrous iron-sensing transcriptional regulator FeoC                                                                                  | -1.20  | $2.28 \times 10^{-7}$  |
| CSF007_0985  | Ferrous iron transport protein B                                                                                                     | -1.50  | $6.78 \times 10^{-11}$ |
| CSF007_0990  | Ferrous iron transport protein A                                                                                                     | -1.75  | $6.88 \times 10^{-8}$  |
| CSF007_10065 | Ferritin-like protein 2                                                                                                              | 1.36   | $1.89 \times 10^{-7}$  |
| CSF007_1015  | hypothetical protein                                                                                                                 | -0.74  | 0.000568               |
| CSF007_10170 | Putative membrane protein                                                                                                            | 0.99   | $6.75 \times 10^{-5}$  |
| CSF007_10235 | Ribosomal RNA large subunit methyltransferase A                                                                                      | 0.84   | $1.69 \times 10^{-5}$  |
| CSF007_10335 | Lipid A export ATP-binding/permease protein MsbA                                                                                     | -0.95  | $3.88 \times 10^{-5}$  |
| CSF007_10695 | hypothetical protein                                                                                                                 | 1.26   | $3.55 \times 10^{-6}$  |
| CSF007_11010 | Lysine decarboxylase%2C inducible                                                                                                    | 1.29   | $9.23 \times 10^{-7}$  |
| CSF007_11035 | Transcriptional repressor of PutA and PutP / Proline dehydrogenase (Proline oxidase) / Delta-1-pyrroline-5-carboxylate dehydrogenase | -1.12  | $9.24 \times 10^{-6}$  |
| CSF007_11450 | tRNA-Ser                                                                                                                             | -1.87  | $1.17 \times 10^{-5}$  |
| CSF007_11455 | hypothetical protein                                                                                                                 | -2.12  | $8.23 \times 10^{-28}$ |
| CSF007_1170  | Transcriptional regulator YPDSF_0092%2C LacI family                                                                                  | -1.06  | $1.61 \times 10^{-5}$  |
| CSF007_11760 | Putrescine importer                                                                                                                  | 1.43   | $1.44 \times 10^{-7}$  |
| CSF007_11775 | Ferrichrome transport ATP-binding protein FhuC                                                                                       | -1.57  | $3.04 \times 10^{-10}$ |
| CSF007_11780 | Iron(III) dicitrate transport system permease protein FecD                                                                           | -1.60  | $1.44 \times 10^{-7}$  |

|              |                                                                                                                            |       |                        |
|--------------|----------------------------------------------------------------------------------------------------------------------------|-------|------------------------|
| CSF007_11785 | Putative periplasmic substrate-binding transport protein<br>PTS system%2C fructose-specific IIB component-PTS system%2C    | -1.95 | $3.45 \times 10^{-15}$ |
| CSF007_11810 | fructose-specific IIC component<br>Fructose-specific phosphocarrier protein HPr-PTS system%2C fructose-                    | 1.95  | $1.10 \times 10^{-11}$ |
| CSF007_11820 | specific IIA component                                                                                                     | 1.30  | $3.62 \times 10^{-5}$  |
| CSF007_11865 | Mannonate dehydratase                                                                                                      | -1.46 | $8.78 \times 10^{-10}$ |
| CSF007_11875 | D-mannonate oxidoreductase                                                                                                 | -1.87 | $3.62 \times 10^{-13}$ |
| CSF007_1205  | hypothetical protein                                                                                                       | -0.75 | 0.000372               |
| CSF007_1210  | Cyclic AMP receptor protein                                                                                                | -1.32 | $5.98 \times 10^{-8}$  |
| CSF007_12280 | Uncharacterized protein YfaZ precursor                                                                                     | 0.98  | $9.55 \times 10^{-6}$  |
| CSF007_12285 | Catalase                                                                                                                   | 4.10  | $3.26 \times 10^{-59}$ |
| CSF007_12375 | NADH-ubiquinone oxidoreductase chain E<br>NADH-ubiquinone oxidoreductase chain C-NADH-ubiquinone                           | -0.86 | 0.00015                |
| CSF007_12380 | oxidoreductase chain D                                                                                                     | -1.01 | $5.05 \times 10^{-5}$  |
| CSF007_12385 | NADH-ubiquinone oxidoreductase chain B                                                                                     | -0.85 | 0.000486               |
| CSF007_12390 | NADH ubiquinone oxidoreductase chain A                                                                                     | -0.90 | $7.72 \times 10^{-5}$  |
| CSF007_12450 | Ascorbate-specific PTS system%2C EIIA component                                                                            | -3.07 | $6.74 \times 10^{-23}$ |
| CSF007_12455 | Putative sugar phosphotransferase component II B                                                                           | -3.21 | $1.62 \times 10^{-22}$ |
| CSF007_12460 | membrane protein<br>Histidine ABC transporter%2C histidine-binding periplasmic protein                                     | -2.21 | $3.34 \times 10^{-18}$ |
| CSF007_12505 | precursor HisJ                                                                                                             | -1.23 | 0.000314               |
| CSF007_12510 | hypothetical protein                                                                                                       | -1.37 | $1.65 \times 10^{-5}$  |
| CSF007_12625 | 3-oxoacyl-[acyl-carrier-protein] synthase%2C KASI                                                                          | -0.89 | 0.000999               |
| CSF007_12645 | Putative membrane protein YfcA                                                                                             | 0.80  | 0.00062                |
| CSF007_12680 | 3-ketoacyl-CoA thiolase                                                                                                    | -1.24 | $1.82 \times 10^{-7}$  |
| CSF007_12840 | Nucleoside permease NupC                                                                                                   | -0.94 | $1.43 \times 10^{-5}$  |
| CSF007_12845 | tRNA-Lys                                                                                                                   | 1.17  | 0.000997               |
| CSF007_12920 | hypothetical protein                                                                                                       | 0.88  | 0.00014                |
| CSF007_12965 | Sialic acid transporter (permease) NanT                                                                                    | -1.92 | $2.90 \times 10^{-12}$ |
| CSF007_12985 | N-acetylmannosamine-6-phosphate 2-epimerase                                                                                | -0.95 | 0.000242               |
| CSF007_13080 | NADP-dependent malic enzyme                                                                                                | -1.12 | $9.98 \times 10^{-8}$  |
| CSF007_1330  | tRNA 5-methylaminomethyl-2-thiouridine synthase TusB                                                                       | 0.86  | 0.000399               |
| CSF007_13380 | hypothetical protein                                                                                                       | -1.16 | $1.44 \times 10^{-6}$  |
| CSF007_13405 | Inosine-5-monophosphate dehydrogenase                                                                                      | 0.91  | 0.000343               |
| CSF007_13705 | Sigma factor RpoE regulatory protein RseC                                                                                  | 1.25  | $2.39 \times 10^{-6}$  |
| CSF007_13710 | Sigma factor RpoE negative regulatory protein RseB precursor                                                               | 1.01  | $6.13 \times 10^{-6}$  |
| CSF007_13720 | RNA polymerase sigma factor RpoE                                                                                           | 0.98  | 0.000806               |
| CSF007_13750 | Pyruvate formate-lyase                                                                                                     | 1.13  | $5.01 \times 10^{-5}$  |
| CSF007_13880 | Phosphosugar isomerase/binding protein                                                                                     | -1.01 | $2.19 \times 10^{-6}$  |
| CSF007_13885 | D-ribulokinase                                                                                                             | -0.94 | $6.94 \times 10^{-7}$  |
| CSF007_13895 | Ribose ABC transport system%2C permease protein RbsC<br>Ribose/xylose/arabinose/galactoside ABC-type transport system ATP- | -1.48 | $1.29 \times 10^{-12}$ |
| CSF007_13900 | binding protein                                                                                                            | -2.08 | $2.79 \times 10^{-28}$ |
| CSF007_13905 | hypothetical protein<br>Ribose/xylose/arabinose/galactoside ABC-type transport system                                      | -3.28 | $2.14 \times 10^{-13}$ |
| CSF007_13910 | periplasmic sugar binding protein                                                                                          | -2.48 | $1.26 \times 10^{-19}$ |
| CSF007_13970 | Acid shock protein 2 precursor                                                                                             | -1.40 | $4.10 \times 10^{-7}$  |
| CSF007_14045 | hypothetical tRNA/rRNA methyltransferase yfiF                                                                              | 0.88  | 0.00058                |
| CSF007_14050 | hypothetical protein                                                                                                       | 3.31  | $1.55 \times 10^{-34}$ |
| CSF007_14055 | Thioredoxin 2                                                                                                              | 4.53  | $2.39 \times 10^{-54}$ |
| CSF007_14060 | hypothetical protein                                                                                                       | 3.64  | $2.92 \times 10^{-48}$ |
| CSF007_14065 | Protein acetyltransferase<br>Hypothetical protein YqcC clustered with tRNA pseudouridine                                   | 2.30  | $5.60 \times 10^{-23}$ |
| CSF007_14315 | synthase C                                                                                                                 | 0.82  | $7.39 \times 10^{-5}$  |

|              |                                                                                               |       |                         |
|--------------|-----------------------------------------------------------------------------------------------|-------|-------------------------|
| CSF007_14500 | Galactose operon repressor%2C GalR-LacI family of transcriptional regulators                  | -0.92 | $1.31 \times 10^{-6}$   |
| CSF007_14700 | Predicted hemolysin III like membrane protein                                                 | -0.80 | 0.000572                |
| CSF007_14715 | Glycine cleavage system H protein                                                             | -0.81 | 0.000445                |
| CSF007_14720 | Aminomethyltransferase (glycine cleavage system T protein)                                    | -1.11 | $3.59 \times 10^{-9}$   |
| CSF007_14815 | hypothetical protein                                                                          | 2.02  | $5.84 \times 10^{-7}$   |
| CSF007_14820 | hypothetical protein                                                                          | 3.31  | $1.76 \times 10^{-11}$  |
| CSF007_15070 | hypothetical protein                                                                          | -0.92 | $1.30 \times 10^{-6}$   |
| CSF007_15200 | Amide synthase component of siderophore synthetase                                            | 2.78  | $6.43 \times 10^{-21}$  |
| CSF007_15205 | 2%2C3-dihydro-2%2C3-dihydroxybenzoate dehydrogenase of siderophore biosynthesis               | 2.16  | $1.07 \times 10^{-14}$  |
| CSF007_15210 | Isochorismatase of siderophore biosynthesis                                                   | 2.07  | $2.68 \times 10^{-13}$  |
| CSF007_15255 | Enterobactin synthetase component F%2C serine activating enzyme                               | 1.52  | $6.32 \times 10^{-9}$   |
| CSF007_15260 | Polymyxin synthetase PmxB                                                                     | 1.82  | $9.44 \times 10^{-19}$  |
| CSF007_15265 | Enterobactin esterase                                                                         | 1.30  | $1.40 \times 10^{-7}$   |
| CSF007_15270 | Ferrichrome-iron receptor                                                                     | 1.10  | $5.01 \times 10^{-5}$   |
| CSF007_15345 | Biopolymer transport protein ExbD/ToIR                                                        | -1.10 | 0.000176                |
| CSF007_15665 | 23S rRNA (guanine-N-2-)-methyltransferase rlmG                                                | 0.84  | 0.000204                |
| CSF007_15715 | hypothetical protein                                                                          | -2.64 | $2.61 \times 10^{-10}$  |
| CSF007_15720 | Hexuronate transporter                                                                        | -2.38 | $7.15 \times 10^{-28}$  |
| CSF007_15765 | Inner membrane protein YqjF                                                                   | 0.95  | $5.66 \times 10^{-6}$   |
| CSF007_1600  | Acetyl-coenzyme A synthetase                                                                  | -0.93 | $1.66 \times 10^{-6}$   |
| CSF007_16000 | hypothetical protein                                                                          | -1.42 | $2.65 \times 10^{-6}$   |
| CSF007_16005 | Trehalose-6-phosphate hydrolase                                                               | -2.46 | $3.37 \times 10^{-14}$  |
| CSF007_16010 | PTS system%2C trehalose-specific IIB component-PTS system%2C trehalose-specific IIC component | -3.39 | $3.53 \times 10^{-41}$  |
| CSF007_16315 | Maltose operon periplasmic protein MalM                                                       | -1.51 | $6.85 \times 10^{-6}$   |
| CSF007_16325 | Maltose/maltodextrin transport ATP-binding protein MalK                                       | -1.81 | $6.80 \times 10^{-6}$   |
| CSF007_16340 | Maltose/maltodextrin ABC transporter%2C substrate binding periplasmic protein MalE            | -1.68 | $5.91 \times 10^{-8}$   |
| CSF007_16355 | PsiE protein                                                                                  | 1.32  | $6.05 \times 10^{-10}$  |
| CSF007_16360 | Glucose-6-phosphate isomerase                                                                 | 2.24  | $6.00 \times 10^{-22}$  |
| CSF007_16530 | Isocitrate lyase                                                                              | -0.69 | 0.000926                |
| CSF007_17470 | Soluble pyridine nucleotide transhydrogenase                                                  | -1.14 | $1.89 \times 10^{-6}$   |
| CSF007_17480 | Peroxiredoxin family protein/glutaredoxin                                                     | 6.95  | $4.94 \times 10^{-128}$ |
| CSF007_17485 | Dihydrolipoamide dehydrogenase                                                                | 7.07  | $1.97 \times 10^{-146}$ |
| CSF007_17495 | hypothetical protein                                                                          | 2.06  | $1.51 \times 10^{-26}$  |
| CSF007_17500 | hypothetical protein                                                                          | 1.79  | $5.04 \times 10^{-20}$  |
| CSF007_1760  | Aspartate ammonia-lyase                                                                       | -1.01 | $6.88 \times 10^{-5}$   |
| CSF007_17650 | Glycerol uptake facilitator protein                                                           | -2.39 | $1.55 \times 10^{-28}$  |
| CSF007_17655 | Glycerol kinase                                                                               | -2.56 | $1.20 \times 10^{-19}$  |
| CSF007_17695 | 6-phosphofructokinase                                                                         | 1.21  | $1.03 \times 10^{-6}$   |
| CSF007_17975 | Glutamine synthetase type I                                                                   | -1.09 | 0.00014                 |
| CSF007_17985 | Nitrogen regulation protein NR(I)                                                             | -0.76 | 0.000579                |
| CSF007_18075 | Ribose ABC transport system%2C periplasmic ribose-binding protein RbsB                        | -1.41 | $1.96 \times 10^{-11}$  |
| CSF007_18080 | Ribose ABC transport system%2C permease protein RbsC                                          | -0.72 | 0.000851                |
| CSF007_18085 | Ribose ABC transport system%2C ATP-binding protein RbsA                                       | -1.51 | $7.72 \times 10^{-10}$  |
| CSF007_18090 | Ribose ABC transport system%2C high affinity permease RbsD                                    | -1.66 | $1.10 \times 10^{-11}$  |
| CSF007_1900  | tRNA-Gly                                                                                      | 0.81  | $7.70 \times 10^{-5}$   |
| CSF007_3355  | Aconitate hydratase 2                                                                         | -1.69 | $3.40 \times 10^{-12}$  |
| CSF007_5505  | hypothetical protein                                                                          | -0.78 | $1.77 \times 10^{-5}$   |
| CSF007_5525  | Glutamate Aspartate periplasmic binding protein precursor GltI                                | -1.56 | $7.31 \times 10^{-11}$  |
| CSF007_5790  | Citrate synthase (si)                                                                         | -3.23 | $8.51 \times 10^{-22}$  |

|             |                                                                                                     |       |                        |
|-------------|-----------------------------------------------------------------------------------------------------|-------|------------------------|
| CSF007_5795 | Succinate dehydrogenase cytochrome b-556 subunit                                                    | -2.64 | $4.76 \times 10^{-26}$ |
| CSF007_5800 | Succinate dehydrogenase hydrophobic membrane anchor protein                                         | -2.49 | $4.39 \times 10^{-19}$ |
| CSF007_5805 | Succinate dehydrogenase flavoprotein subunit                                                        | -2.65 | $2.01 \times 10^{-22}$ |
| CSF007_5810 | Succinate dehydrogenase iron-sulfur protein                                                         | -2.47 | $1.33 \times 10^{-16}$ |
| CSF007_5815 | 2-oxoglutarate dehydrogenase E1 component                                                           | -1.80 | $2.19 \times 10^{-13}$ |
| CSF007_5820 | Dihydrolipoamide succinyltransferase component (E2) of 2-oxoglutarate dehydrogenase complex         | -1.41 | $7.97 \times 10^{-8}$  |
| CSF007_5825 | Succinyl-CoA ligase [ADP-forming] beta chain                                                        | -1.60 | $7.19 \times 10^{-8}$  |
| CSF007_5830 | Succinyl-CoA ligase [ADP-forming] alpha chain                                                       | -1.63 | $1.56 \times 10^{-9}$  |
| CSF007_5840 | Cytochrome d ubiquinol oxidase subunit I                                                            | 1.21  | $1.89 \times 10^{-6}$  |
| CSF007_5845 | Cytochrome d ubiquinol oxidase subunit II                                                           | 1.14  | $1.98 \times 10^{-6}$  |
| CSF007_5895 | tRNA-Lys                                                                                            | 1.27  | 0.000561               |
| CSF007_5900 | tRNA-Lys                                                                                            | 0.96  | $5.80 \times 10^{-7}$  |
| CSF007_5905 | tRNA-Lys                                                                                            | 1.00  | $5.13 \times 10^{-8}$  |
| CSF007_5965 | Galactose-1-phosphate uridylyltransferase                                                           | -1.33 | $7.03 \times 10^{-8}$  |
| CSF007_5970 | UDP-N-acetylglucosamine 4-epimerase-UDP-glucose 4-epimerase                                         | -1.48 | $2.09 \times 10^{-10}$ |
| CSF007_6300 | Non-specific DNA-binding protein Dps / Iron-binding ferritin-like antioxidant protein / Ferroxidase | 4.39  | $4.13 \times 10^{-66}$ |
| CSF007_6370 | Possible MFS Superfamily transporter precursor                                                      | 1.04  | $4.09 \times 10^{-5}$  |
| CSF007_6390 | hypothetical protein                                                                                | -1.65 | $4.00 \times 10^{-5}$  |
| CSF007_6395 | Galactose/methyl galactoside ABC transport system%2C D-galactose-binding periplasmic protein MglB   | -2.08 | $2.72 \times 10^{-14}$ |
| CSF007_6400 | Galactose/methyl galactoside ABC transport system%2C ATP-binding protein MglA                       | -1.13 | $1.92 \times 10^{-7}$  |
| CSF007_6500 | 6-phosphogluconate dehydrogenase%2C decarboxylating                                                 | 1.82  | $1.02 \times 10^{-13}$ |
| CSF007_6595 | L-serine dehydratase%2C beta subunit-L-serine dehydratase%2C alpha subunit                          | -1.06 | 0.000227               |
| CSF007_6600 | Serine transporter                                                                                  | -1.30 | $3.63 \times 10^{-7}$  |
| CSF007_6685 | Glutaredoxin 1                                                                                      | 3.96  | $8.92 \times 10^{-56}$ |
| CSF007_6760 | Arginine ABC transporter%2C periplasmic arginine-binding protein ArtI                               | 0.95  | $8.89 \times 10^{-7}$  |
| CSF007_6765 | Arginine ABC transporter%2C ATP-binding protein ArtP                                                | 1.05  | $9.24 \times 10^{-6}$  |
| CSF007_6870 | Thioredoxin reductase                                                                               | 2.23  | $3.39 \times 10^{-20}$ |
| CSF007_9025 | Alkyl sulfatase                                                                                     | -0.93 | $2.94 \times 10^{-6}$  |
| CSF007_9035 | hypothetical protein                                                                                | -1.05 | $9.23 \times 10^{-7}$  |
| CSF007_9550 | Putative transport protein                                                                          | -1.80 | $4.34 \times 10^{-12}$ |
| CSF007_9585 | tRNA-Val                                                                                            | 1.15  | $3.88 \times 10^{-5}$  |
| CSF007_9590 | Pyruvate kinase                                                                                     | 1.95  | $7.27 \times 10^{-15}$ |
| CSF007_9605 | Sulfur acceptor protein SufE for iron-sulfur cluster assembly                                       | 0.94  | 0.000484               |
| CSF007_9610 | Cysteine desulfurase%2C SufS subfamily                                                              | 0.97  | $4.77 \times 10^{-5}$  |
| CSF007_9630 | Iron binding protein SufA for iron-sulfur cluster assembly                                          | 0.71  | 0.000742               |
| CSF007_9650 | Phosphoenolpyruvate synthase                                                                        | -1.82 | $6.56 \times 10^{-15}$ |
| CSF007_9670 | hypothetical protein                                                                                | -2.85 | $1.01 \times 10^{-17}$ |
| CSF007_9675 | TonB-dependent hemin%2C ferrichrome receptor                                                        | -1.55 | $9.46 \times 10^{-16}$ |
| CSF007_9680 | Hemin transport protein HmuS                                                                        | -1.06 | $1.77 \times 10^{-5}$  |
| CSF007_9870 | hypothetical protein                                                                                | -1.83 | $7.14 \times 10^{-6}$  |

### 30 min vs 0

| Gene ID     | Function of the gene product                                                           | logFC | FDR                   |
|-------------|----------------------------------------------------------------------------------------|-------|-----------------------|
| CSF007_0245 | 16 kDa heat shock protein A                                                            | -1.80 | $6.55 \times 10^{-6}$ |
| CSF007_0605 | Aerobic C4-dicarboxylate transporter for fumarate%2C L-malate%2C D-malate%2C succinate | -1.09 | 0.000456              |
| CSF007_0675 | Oligopeptidase A                                                                       | -1.29 | 0.000435              |

|              |                                                                                                                                      |       |                        |
|--------------|--------------------------------------------------------------------------------------------------------------------------------------|-------|------------------------|
| CSF007_0690  | Universal stress protein A                                                                                                           | -1.56 | $5.98 \times 10^{-6}$  |
| CSF007_0865  | Gluconokinase                                                                                                                        | -1.80 | $7.28 \times 10^{-6}$  |
| CSF007_0915  | Aerobic glycerol-3-phosphate dehydrogenase                                                                                           | 1.28  | $5.16 \times 10^{-6}$  |
| CSF007_0935  | Transcriptional activator of maltose regulon%2C MalT                                                                                 | -1.48 | $8.42 \times 10^{-7}$  |
| CSF007_10015 | putative lipoprotein                                                                                                                 | 1.14  | 0.000789               |
| CSF007_10150 | PTS system%2C mannose-specific IIA component / PTS system%2C mannose-specific IIB component                                          | -2.00 | $2.32 \times 10^{-6}$  |
| CSF007_10155 | PTS system%2C mannose-specific IIC component                                                                                         | -1.86 | $2.38 \times 10^{-10}$ |
| CSF007_10160 | PTS system%2C mannose-specific IID component                                                                                         | -1.58 | $5.83 \times 10^{-5}$  |
| CSF007_10265 | Lipid A acylation protein PagP%2C palmitoyltransferase                                                                               | 1.12  | 0.000305               |
| CSF007_10385 | Cold shock protein CspG                                                                                                              | 2.52  | $7.97 \times 10^{-5}$  |
| CSF007_11035 | Transcriptional repressor of PutA and PutP / Proline dehydrogenase (Proline oxidase) / Delta-1-pyrroline-5-carboxylate dehydrogenase | -2.14 | $5.30 \times 10^{-14}$ |
| CSF007_11425 | Beta-galactosidase                                                                                                                   | -1.18 | $4.19 \times 10^{-5}$  |
| CSF007_11455 | hypothetical protein                                                                                                                 | -1.57 | $4.48 \times 10^{-5}$  |
| CSF007_1165  | Putative membrane receptor protein                                                                                                   | -1.42 | $2.99 \times 10^{-7}$  |
| CSF007_11760 | Putrescine importer                                                                                                                  | 1.71  | $4.96 \times 10^{-5}$  |
| CSF007_11865 | Mannonate dehydratase                                                                                                                | -2.13 | $6.04 \times 10^{-12}$ |
| CSF007_11875 | D-mannonate oxidoreductase                                                                                                           | -2.57 | $4.08 \times 10^{-14}$ |
| CSF007_1210  | Cyclic AMP receptor protein                                                                                                          | -1.42 | $1.30 \times 10^{-5}$  |
| CSF007_12285 | Catalase                                                                                                                             | 1.54  | $9.40 \times 10^{-9}$  |
| CSF007_12340 | NADH-ubiquinone oxidoreductase chain L                                                                                               | -1.12 | 0.000547               |
| CSF007_12345 | NADH-ubiquinone oxidoreductase chain K                                                                                               | -1.38 | $9.35 \times 10^{-5}$  |
| CSF007_12350 | NADH-ubiquinone oxidoreductase chain J                                                                                               | -1.29 | $7.97 \times 10^{-5}$  |
| CSF007_12355 | NADH-ubiquinone oxidoreductase chain I                                                                                               | -1.22 | 0.00014                |
| CSF007_12360 | NADH-ubiquinone oxidoreductase chain H                                                                                               | -1.07 | 0.000101               |
| CSF007_12365 | NADH-ubiquinone oxidoreductase chain G                                                                                               | -1.17 | 0.000143               |
| CSF007_12450 | Ascorbate-specific PTS system%2C EIIA component                                                                                      | -3.17 | $6.76 \times 10^{-10}$ |
| CSF007_12455 | Putative sugar phosphotransferase component II B                                                                                     | -3.52 | $1.76 \times 10^{-9}$  |
| CSF007_12460 | membrane protein                                                                                                                     | -2.35 | $7.75 \times 10^{-9}$  |
| CSF007_12810 | Glucokinase                                                                                                                          | -2.03 | $3.32 \times 10^{-5}$  |
| CSF007_12920 | hypothetical protein                                                                                                                 | 1.11  | 0.000155               |
| CSF007_12965 | Sialic acid transporter (permease) NanT                                                                                              | -2.72 | $4.08 \times 10^{-14}$ |
| CSF007_13080 | NADP-dependent malic enzyme                                                                                                          | -1.68 | $2.82 \times 10^{-9}$  |
| CSF007_13300 | Putative heat shock protein YegD                                                                                                     | 1.37  | $4.65 \times 10^{-5}$  |
| CSF007_13400 | GMP synthase [glutamine-hydrolyzing]                                                                                                 | 1.29  | $5.70 \times 10^{-5}$  |
| CSF007_13405 | Inosine-5-monophosphate dehydrogenase                                                                                                | 1.19  | 0.000169               |
| CSF007_13880 | Phosphosugar isomerase/binding protein                                                                                               | -1.98 | $6.52 \times 10^{-9}$  |
| CSF007_13885 | D-ribulokinase                                                                                                                       | -2.04 | $9.33 \times 10^{-14}$ |
| CSF007_13895 | Ribose ABC transport system%2C permease protein RbsC                                                                                 | -2.07 | $7.16 \times 10^{-12}$ |
| CSF007_13900 | Ribose/xylose/arabinose/galactoside ABC-type transport system ATP-binding protein                                                    | -2.06 | $7.97 \times 10^{-5}$  |
| CSF007_13905 | hypothetical protein                                                                                                                 | -5.24 | $6.87 \times 10^{-10}$ |
| CSF007_13910 | Ribose/xylose/arabinose/galactoside ABC-type transport system periplasmic sugar binding protein                                      | -3.70 | $1.55 \times 10^{-33}$ |
| CSF007_14710 | Glycine dehydrogenase [decarboxylating] (glycine cleavage system P protein)                                                          | -1.40 | $2.51 \times 10^{-6}$  |
| CSF007_14715 | Glycine cleavage system H protein                                                                                                    | -1.88 | $3.38 \times 10^{-7}$  |
| CSF007_14720 | Aminomethyltransferase (glycine cleavage system T protein)                                                                           | -1.68 | $7.18 \times 10^{-10}$ |
| CSF007_15470 | 3%2C4-dihydroxy-2-butanone 4-phosphate synthase                                                                                      | 2.00  | $9.22 \times 10^{-14}$ |
| CSF007_15695 | Inner membrane protein ygjV                                                                                                          | -1.22 | 0.00046                |
| CSF007_15700 | Altronate dehydratase                                                                                                                | -1.53 | $1.13 \times 10^{-5}$  |
| CSF007_15705 | Altronate oxidoreductase                                                                                                             | -1.56 | $2.24 \times 10^{-6}$  |
| CSF007_15710 | Uronate isomerase                                                                                                                    | -1.55 | $1.79 \times 10^{-5}$  |

|              |                                                                                                                      |       |                        |
|--------------|----------------------------------------------------------------------------------------------------------------------|-------|------------------------|
| CSF007_15715 | hypothetical protein                                                                                                 | -3.74 | $1.21 \times 10^{-17}$ |
| CSF007_15720 | Hexuronate transporter                                                                                               | -2.40 | $1.25 \times 10^{-10}$ |
| CSF007_15880 | Outer membrane stress sensor protease DegQ%2C serine protease                                                        | -1.41 | $7.04 \times 10^{-5}$  |
| CSF007_16000 | hypothetical protein                                                                                                 | -1.99 | $6.12 \times 10^{-6}$  |
| CSF007_16005 | Trehalose-6-phosphate hydrolase<br>PTS system%2C trehalose-specific IIB component-PTS system%2C                      | -3.86 | $3.31 \times 10^{-24}$ |
| CSF007_16010 | trehalose-specific IIC component                                                                                     | -3.85 | $1.29 \times 10^{-27}$ |
| CSF007_16175 | tRNA dihydrouridine synthase B                                                                                       | 1.38  | $6.73 \times 10^{-6}$  |
| CSF007_16180 | DNA-binding protein Fis                                                                                              | 1.28  | 0.00037                |
| CSF007_16315 | Maltose operon periplasmic protein MalM<br>Maltoporin (maltose/maltodextrin high-affinity receptor%2C phage          | -2.03 | 0.000431               |
| CSF007_16320 | lambda receptor protein)                                                                                             | -2.12 | 0.000568               |
| CSF007_16325 | Maltose/maltodextrin transport ATP-binding protein MalK<br>Maltose/maltodextrin ABC transporter%2C substrate binding | -2.93 | $3.65 \times 10^{-8}$  |
| CSF007_16340 | periplasmic protein MalE                                                                                             | -2.03 | $1.45 \times 10^{-6}$  |
| CSF007_17480 | Peroxiredoxin family protein/glutaredoxin                                                                            | 1.12  | $7.36 \times 10^{-5}$  |
| CSF007_17485 | Dihydrolipoamide dehydrogenase                                                                                       | 1.28  | $2.16 \times 10^{-7}$  |
| CSF007_1760  | Aspartate ammonia-lyase                                                                                              | -1.98 | $3.86 \times 10^{-12}$ |
| CSF007_17650 | Glycerol uptake facilitator protein                                                                                  | -2.08 | $5.48 \times 10^{-11}$ |
| CSF007_17655 | Glycerol kinase                                                                                                      | -3.31 | $2.81 \times 10^{-15}$ |
| CSF007_1770  | Heat shock protein 60 family co-chaperone GroES                                                                      | -1.22 | 0.000862               |
| CSF007_17975 | Glutamine synthetase type I                                                                                          | 1.92  | $4.07 \times 10^{-5}$  |
| CSF007_17980 | Nitrogen regulation protein NtrB<br>Ribose ABC transport system%2C periplasmic ribose-binding protein                | 1.44  | $1.74 \times 10^{-7}$  |
| CSF007_18075 | RbsB                                                                                                                 | -1.57 | $8.42 \times 10^{-7}$  |
| CSF007_18085 | Ribose ABC transport system%2C ATP-binding protein RbsA                                                              | -1.85 | $2.56 \times 10^{-6}$  |
| CSF007_18090 | Ribose ABC transport system%2C high affinity permease RbsD                                                           | -2.16 | $4.82 \times 10^{-8}$  |
| CSF007_3355  | Aconitate hydratase 2                                                                                                | -1.66 | $1.56 \times 10^{-6}$  |
| CSF007_5505  | hypothetical protein                                                                                                 | -1.18 | $1.44 \times 10^{-5}$  |
| CSF007_5790  | Citrate synthase (si)                                                                                                | -3.11 | $8.36 \times 10^{-10}$ |
| CSF007_5795  | Succinate dehydrogenase cytochrome b-556 subunit                                                                     | -2.04 | $9.68 \times 10^{-13}$ |
| CSF007_5800  | Succinate dehydrogenase hydrophobic membrane anchor protein                                                          | -2.64 | $1.15 \times 10^{-10}$ |
| CSF007_5805  | Succinate dehydrogenase flavoprotein subunit                                                                         | -3.18 | $3.94 \times 10^{-18}$ |
| CSF007_5810  | Succinate dehydrogenase iron-sulfur protein                                                                          | -3.06 | $6.67 \times 10^{-15}$ |
| CSF007_5815  | 2-oxoglutarate dehydrogenase E1 component<br>Dihydrolipoamide succinyltransferase component (E2) of 2-               | -2.96 | $3.74 \times 10^{-18}$ |
| CSF007_5820  | oxoglutarate dehydrogenase complex                                                                                   | -2.87 | $1.10 \times 10^{-12}$ |
| CSF007_5825  | Succinyl-CoA ligase [ADP-forming] beta chain                                                                         | -2.86 | $5.80 \times 10^{-10}$ |
| CSF007_5830  | Succinyl-CoA ligase [ADP-forming] alpha chain                                                                        | -3.01 | $4.78 \times 10^{-14}$ |
| CSF007_5840  | Cytochrome d ubiquinol oxidase subunit I                                                                             | 1.49  | 0.000107               |
| CSF007_5845  | Cytochrome d ubiquinol oxidase subunit II                                                                            | 1.48  | $2.78 \times 10^{-5}$  |
| CSF007_6145  | ATP-dependent RNA helicase RhlE<br>Non-specific DNA-binding protein Dps / Iron-binding ferritin-like                 | 1.44  | 0.000103               |
| CSF007_6300  | antioxidant protein / Ferroxidase<br>Galactose/methyl galactoside ABC transport system%2C D-galactose-               | 1.90  | $5.48 \times 10^{-11}$ |
| CSF007_6395  | binding periplasmic protein MglB<br>Galactose/methyl galactoside ABC transport system%2C ATP-binding                 | -2.79 | $1.40 \times 10^{-17}$ |
| CSF007_6400  | protein MglA                                                                                                         | -1.72 | $6.99 \times 10^{-9}$  |
| CSF007_9025  | Alkyl sulfatase                                                                                                      | -1.32 | $1.03 \times 10^{-5}$  |
| CSF007_9550  | Putative transport protein                                                                                           | -1.51 | $2.19 \times 10^{-6}$  |
| CSF007_9590  | Pyruvate kinase                                                                                                      | 2.11  | $9.00 \times 10^{-13}$ |
| CSF007_9650  | Phosphoenolpyruvate synthase                                                                                         | -2.54 | $1.16 \times 10^{-9}$  |
| CSF007_9675  | TonB-dependent hemin%2C ferrichrome receptor                                                                         | -1.13 | 0.000184               |
| CSF007_9680  | Hemin transport protein HmuS                                                                                         | -1.38 | 0.000972               |

## 60 min vs 0

| Gene ID      | Function of the gene product                                                                                             | logFC | FDR                    |
|--------------|--------------------------------------------------------------------------------------------------------------------------|-------|------------------------|
| CSF007_0245  | 16 kDa heat shock protein A                                                                                              | 1.28  | 0.000686               |
| CSF007_0915  | Aerobic glycerol-3-phosphate dehydrogenase<br>PTS system%2C fructose-specific IIB component-PTS system%2C                | 1.66  | $3.28 \times 10^{-9}$  |
| CSF007_11810 | fructose-specific IIC component                                                                                          | 4.34  | $2.17 \times 10^{-20}$ |
| CSF007_11815 | 1-phosphofructokinase<br>Fructose-specific phosphocarrier protein HPr-PTS system%2C fructose-                            | 3.35  | $5.91 \times 10^{-9}$  |
| CSF007_11820 | specific IIA component                                                                                                   | 4.38  | $4.38 \times 10^{-13}$ |
| CSF007_11825 | Putative Mut family protein                                                                                              | 1.32  | $2.73 \times 10^{-8}$  |
| CSF007_13975 | Glutaredoxin-like protein NrdH                                                                                           | 2.84  | $5.11 \times 10^{-12}$ |
| CSF007_13980 | Ribonucleotide reduction protein NrdI                                                                                    | 3.24  | $4.52 \times 10^{-19}$ |
| CSF007_13985 | Ribonucleotide reductase of class Ib (aerobic)%2C alpha subunit                                                          | 2.89  | $2.17 \times 10^{-20}$ |
| CSF007_13990 | Ribonucleotide reductase of class Ib (aerobic)%2C beta subunit<br>2%2C3-dihydro-2%2C3-dihydroxybenzoate dehydrogenase of | 2.59  | $1.36 \times 10^{-16}$ |
| CSF007_15205 | siderophore biosynthesis                                                                                                 | 1.03  | 0.000604               |
| CSF007_15220 | Isochorismate synthase of siderophore biosynthesis                                                                       | 1.10  | 0.000399               |
| CSF007_17655 | Glycerol kinase                                                                                                          | 1.56  | $3.18 \times 10^{-5}$  |
| CSF007_9650  | Phosphoenolpyruvate synthase                                                                                             | -1.98 | $1.77 \times 10^{-13}$ |
| CSF007_9890  | Manganese ABC transporter%2C periplasmic-binding protein SitA                                                            | 0.99  | 0.000138               |

## REFERENCES

1. Wauters, G.; Janssens, M.; Steigerwalt, A.D.; Brenner, D.J. *Yersinia mollaretii* sp. nov. and *Yersinia bercovieri* sp. nov., formerly called *Yersinia enterocolitica* biogroups 3A and 3B. *Int J Syst Bacteriol* **1988**, *38*, 424-429.
2. Schiemann, D.A.; Devenish, J.A. Relationship of HeLa cell infectivity to biochemical, serological, and virulence characteristics of *Yersinia enterocolitica*. *Infect. Immun.* **1982**, *35*, 497-506.
3. Al-Hendy, A. *Lipopolysaccharide of Yersinia enterocolitica: Molecular genetics and role in virulence*. PhD thesis. University of Turku: Turku, Finland, 1992; Vol. 91, p 112.
4. Skurnik, M. Lack of correlation between the presence of plasmids and fimbriae in *Yersinia enterocolitica* and *Yersinia pseudotuberculosis*. *J. Appl. Bact.* **1984**, *56*, 355-363.
5. Kay, B.A.; Wachsmuth, K.; Gemski, P.; Feeley, J.C.; Quan, T.J.; Brenner, D.J. Virulence and phenotypic characterization of *Yersinia enterocolitica* isolated from humans in the united states. *J. Clin. Microbiol.* **1983**, *17*, 128-138.
6. Perry, R.D.; Brubaker, R.R. Vwa<sup>+</sup> phenotype of *Yersinia enterocolitica*. *Infect. Immun.* **1983**, *40*, 166-171.
7. Kapperud, G.; Skarpeid, H.-J.; Solberg, R.; Bergan, T. Outer membrane proteins and plasmids in different *Yersinia enterocolitica* serogroups isolated from man and animals. *Acta path microbiol immunol scand Sect B* **1985**, *93*, 27-35.
8. Schiemann, D.A. Antigenic identity of *Yersinia enterocolitica* serotypes O:Tacoma and O21. *J Clin Microbiol* **1984**, *20*, 831-832.
9. Doyle, M.P.; Hugdahl, M.B.; Chang, M.T.; Beery, J.T. Serological relatedness of mouse-virulent *Yersinia enterocolitica*. *Infect Immun* **1982**, *37*, 1234-1240.
10. Gemski, P.; Lazere, J.R.; Casey, T. Plasmid associated with pathogenicity and calcium dependency of *Yersinia enterocolitica*. *Infect Immun* **1980**, *27*, 682-685.
11. Portnoy, D.A.; Falkow, S. Virulence-associated plasmids from *Yersinia enterocolitica* and *Yersinia pestis*. *J. Bacteriol.* **1981**, *148*, 877-883.
12. Tsubokura, M.; Aleksic, S. A simplified antigenic scheme for serotyping of *Yersinia pseudotuberculosis*: Phenotypic characterization of reference strains and preparation of O and H factor sera. *Contrib. Microb. Immunol.* **1995**, *13*, 99-105.
13. Samuelsson, K.; Lindberg, B.; Brubaker, R.R. Structure of O-specific side chains of lipopolysaccharides from *Yersinia pseudotuberculosis*. *J. Bacteriol.* **1974**, *117*, 1010-1016.

14. Stevenson, R.M.W.; Airdrie, D.W. Isolation of *Yersinia ruckeri* bacteriophages. *Appl Environm Microbiol* **1984**, *47*, 1201-1205.
